# Supplementary material for: Tomato Bushy Stunt Virus Nanoparticles as a Platform for Drug Delivery to Shh-Dependent Medulloblastoma
Source: MDPI journal article supplement (doi:10.3390/ijms221910523), 2021-09-29
Supplement: s1 [file s1]

**Table S4** – MM/PBSA Results.

| Receptor | Ligand   | Binding Free Energy ( $\Delta G$ , kJ/mol) |                   |                   |                    |
|----------|----------|--------------------------------------------|-------------------|-------------------|--------------------|
|          |          | 0 – 25 ns                                  | 25 – 50 ns        | 50 – 75 ns        | 75 – 100 ns        |
| NRP-1    | tLyp1    | -109.64 +/-101.47                          | -104.56 +/- 93.00 | -86.60 +/- 71.98  | -43.23 +/- 78.39   |
|          | CP-tLyp1 | -3.80 +/- 83.15                            | -74.11 +/- 85.42  | -86.97 +/- 91.77  | -91.07 +/- 74.47   |
| FABP3    | CooP     | -118.27 +/- 25.75                          | -118.20 +/-22.96  | -128.41 +/-18.41  | -129.30 +/- 21.66  |
|          | CP-CooP  | -502.9 +/- 68.07                           | -457.36 +/-108.67 | -391.34 +/-101.20 | -377.07 +/- 131.58 |

Note: Binding Free Energy ( $\Delta G$ ) of the binding sites of receptors in complex with the free peptides and the peptides fused to the CP of TBSV, as predicted by MM/PBSA calculations. The values clearly show that CooP peptide fused to the viral CP recognize with almost 3-fold higher binding affinity the FABP3 receptor ( $\Delta G = -377.07$  kJ/mol vs  $\Delta G = -129.30$  kJ/mol).
