# Supplementary material for: Tomato Bushy Stunt Virus Nanoparticles as a Platform for Drug Delivery to Shh-Dependent Medulloblastoma
Source: MDPI journal article supplement (doi:10.3390/ijms221910523), 2021-09-29
Supplement: s1 [file s1]

**Table S1.** List of the peptides fused to the TBSV CP

| Peptide Name | Peptide Sequence                        |
|--------------|-----------------------------------------|
| RGD          | <i>GGPGG</i> -RGD                       |
| RiGiD        | <i>GGPGG</i> -ARGDK- <b>GPG</b> -ARGDK- |
| CooP         | <i>GGPGG</i> -CGLSGLGVA                 |
| tLyp1        | <i>GGPGG</i> -CGNKRTR                   |
| ApoE         | <i>GGPGG</i> - LRKLRKRLLLRKLRKRL        |

The linker sequence is highlighted in italic, the spacer sequence is in bold.
