# Supplementary material for: Tomato Bushy Stunt Virus Nanoparticles as a Platform for Drug Delivery to Shh-Dependent Medulloblastoma
Source: MDPI journal article supplement (doi:10.3390/ijms221910523), 2021-09-29
Supplement: s1 [file s1]

**Table S3** – H-Bonds Analysis.

| <b>tLyp1</b>   |              |                  | <b>tLyp1 fused to CP of TBSV</b> |              |                  |
|----------------|--------------|------------------|----------------------------------|--------------|------------------|
| <b>H-Bonds</b> |              | <b>Occupancy</b> | <b>H-Bonds</b>                   |              | <b>Occupancy</b> |
| <i>NRP-1</i>   | <i>tLyp1</i> |                  | <i>NRP-1</i>                     | <i>tLyp1</i> |                  |
| GLN 296        | ARG 7        | 19.25 %          | PRO 317                          | ARG 7        | <u>70.94 %</u>   |
| TYR 297        | LYS 4        | 14.43 %          | GLY 318                          | ARG 5        | <u>60.16 %</u>   |
| TYR 297        | ARG 7        | 14.54 %          | GLU 319                          | ARG 5        | <u>59.22 %</u>   |
| GLY 318        | ARG 7        | <u>41.70 %</u>   | GLU 319                          | ASN 3        | <u>51.88 %</u>   |
| GLU 319        | ARG 7        | 16.92 %          | ASP 320                          | ARG 7        | <u>93.93 %</u>   |
| ASP 320        | ASN 3        | 28.57 %          | LYS 351                          | ARG 7        | <u>59.55 %</u>   |
| ASP 320        | ARG 5        | <u>43.96 %</u>   | <b>Residues of CP of TBSV</b>    |              |                  |
| ARG 323        | ARG 7        | 11.56 %          | GLY 375                          | ASP 191      | 30.98 %          |
| THR 413        | ARG 5        | 13.74 %          | LYS 397                          | ASP 191      | 37.65 %          |

  

| <b>CooP</b>    |             |                  | <b>CooP fused to CP of TBSV</b> |             |                  |
|----------------|-------------|------------------|---------------------------------|-------------|------------------|
| <b>H-Bonds</b> |             | <b>Occupancy</b> | <b>H-Bonds</b>                  |             | <b>Occupancy</b> |
| <i>FABP3</i>   | <i>CooP</i> |                  | <i>FABP3</i>                    | <i>CooP</i> |                  |
| TYR 19         | GLY 7       | <u>90.39 %</u>   | THR 53                          | LEU 6       | <u>46.85 %</u>   |
| THR 60         | GLY 2       | 10.49 %          | ARG 106                         | GLY 7       | <u>67.38 %</u>   |
| GLN 95         | GLY 7       | <u>38.99 %</u>   | ARG 126                         | LEU 3       | <u>57.78 %</u>   |
| ARG 126        | ALA 9       | <u>100.00 %</u>  | TYR 128                         | SER 4       | <u>49.94 %</u>   |

  

| <b>Residues of CP of TBSV</b> |         |                |
|-------------------------------|---------|----------------|
| LYS 52                        | ASP 341 | <u>46.58 %</u> |

Note: H-Bonds between peptides and receptors and their occupancy (%) along the simulation. The H-Bonds with occupancy > 40% along the trajectory are underlined. The binding to NRP-1 and of FABP3 by their peptides fused to the TBSV CP seems to be stronger compared to the free peptides as assessed by the higher H-Bonds occupancy values.
