# Supplementary material for: Tomato Bushy Stunt Virus Nanoparticles as a Platform for Drug Delivery to Shh-Dependent Medulloblastoma
Source: MDPI journal article supplement (doi:10.3390/ijms221910523), 2021-09-29
Supplement: s1 [file s1]

**Table S5.** List of the oligonucleotides used for peptides cloning, molecular screening and PCR/qPCR analysis.

| Name                 | 5' --> 3' Sequence                                                             |
|----------------------|--------------------------------------------------------------------------------|
| 5'tLyp1              | CGGAGGTTGTGGAAATAAGAGAACTAGGTGAGAGCTCTTAAT                                     |
| 3'tLyp1              | TAAGAGCTCTCACCTAGTTCTTATTTCCACAACCTCCGGGCC                                     |
| 5'CooP               | CGGAGGTTGTGGTCTTTCTGGATTGGGAGTTGCTTGAGAGCTCTTAAT                               |
| 3'CooP               | TAAGAGCTCTCAAGCAACTCCCAATCCAGAAAGACCACAACCTCCGGGCC                             |
| 5'RiGiD              | CGGAGGTGGGCCCGGAGGAGGTGCTAGAGGAGATAAGGGTCCTGGTGCTAGGGGTGACAAATGAGAGCTCTTAAT    |
| 3'RiGiD              | TAAGAGCTCTCATTGTCACCCCTAGCACCAGGACCCTTATCTCCTCTAGCACCTCCTCCGGGCCACCTCCGGGCC    |
| 5'ApoE               | CGGAGGTCTTAGAAAGTTGAGGAAAAGATTGCTTCTCAGGAAGTTAAGGAAACGACTTCTGTGAGAGCTCTTAAT    |
| 3'ApoE               | TAAGAGCTCTCACAGAAGTCGTTTCCTTAACCTCCTGAGAAGCAATCTTTTCCTCAACTTTCTAAG ACCTCCGGGCC |
| 5'RGD                | CGGAGGTAGAGGAGATTGATTAAT                                                       |
| 3'RGD                | TAATCAATCTCCTCTACCTCCGGGCC                                                     |
| TBSV-For             | TGACATTTCTGTGCAACTGG                                                           |
| TBSV-Rev             | AAGATCCAAGGACTCTGTGC                                                           |
| qTBSV-For            | CGGTTGCAGTCACCAGACAA                                                           |
| qTBSV-Rev            | CCCAGACGTCCTGCCAGTA                                                            |
| qGADPH-For           | CATGGCCTTCCGTGTTCTTA                                                           |
| qGADPH-Rev           | GCGGCACGTCAGATCCA                                                              |
| q $\beta$ -ACTIN-For | CACAGCTTCTTTGCAGCTCCTT                                                         |
| q $\beta$ -ACTIN-Rev | CGTCATCCATGGCGAACTG                                                            |
| qRlp13a-For          | CTGCTCTCAAGGTTGTTCCGGCT                                                        |
| qRlp13a-Rev          | CCTTCCGTTTCTCCTCCAGAGT                                                         |
| qRlp32-For           | TGTGCAACAAATCTTACTGTGCT                                                        |
| qRlp32-Rev           | TGCACACAAGCCATCTACTCA                                                          |
| qTBP-For             | GAAGAACAATCCAGACTAGCAGCA                                                       |
| qTBP-Rev             | CCTTATAGGGGAACCTTCACATCACAG                                                    |
