# Supplementary material for: Tomato Bushy Stunt Virus Nanoparticles as a Platform for Drug Delivery to Shh-Dependent Medulloblastoma
Source: MDPI journal article supplement (doi:10.3390/ijms221910523), 2021-09-29
Supplement: s1 [file s1]

**Table S2** – Molecular Docking Results.

| ClusPro <sup>(a)</sup> or HADDOCK <sup>(b)</sup> complexes | Receptor         | Ligand                            | $\Delta G$<br>(kcal/mol) | H-Bonds  |            |
|------------------------------------------------------------|------------------|-----------------------------------|--------------------------|----------|------------|
|                                                            |                  |                                   |                          | receptor | ligand     |
| tLyp1 – NRP1 <sup>(a)</sup>                                | NRP-1            | tLyp1 peptide                     | -8.9                     | ASP 320  | ARG 5      |
|                                                            |                  |                                   |                          | ASP 320  | THR 6      |
|                                                            |                  |                                   |                          | TYR 353  | LYS 4      |
| CPTLyp1 – NRP1 <sup>(a)</sup>                              | NRP-1            | tLyp1 peptide fused to CP of TBSV | -8.7                     | TYR 297  | LYS 4      |
|                                                            |                  |                                   |                          | PRO 317  | ARG 7      |
|                                                            |                  |                                   |                          | ASP 320  | ARG 5      |
|                                                            |                  |                                   |                          | ASP 320  | ARG 7      |
|                                                            |                  |                                   |                          | GLU 319  | GLY393 (L) |
|                                                            |                  |                                   |                          | TYR 322  | ASN385     |
|                                                            |                  |                                   |                          | ASN 323  | LEU386     |
| tufstin – NRP1 <sup>(a)</sup>                              | NRP-1            | tufstin peptide (natural ligand)  | -7.0                     | TYR 297  | LYS 2      |
|                                                            |                  |                                   |                          | TYR 297  | PRO 3      |
|                                                            |                  |                                   |                          | ASP 320  | ARG 4      |
|                                                            |                  |                                   |                          | LYS 351  | ARG 4      |
| CooP – FABP3 <sup>(a)</sup>                                | FABP3/<br>H-FABP | CooP peptide                      | -12.4                    | TYR 19   | GLY 7      |
|                                                            |                  |                                   |                          | ALA 75   | LEU 6      |
|                                                            |                  |                                   |                          | GLN 95   | LEU 6      |
|                                                            |                  |                                   |                          | ARG 126  | ALA 9      |
| CPCooP – FABP3 <sup>(a)</sup>                              | FABP3/<br>H-FABP | CooP peptide fused to CP of TBSV  | -12.7                    | ASN 59   | PRO390(L)  |
|                                                            |                  |                                   |                          | ALA 75   | LEU 6      |
| OLA – FABP3 <sup>(b)</sup>                                 | FABP3/<br>H-FABP | oleic acid (natural ligand)       | -9.4                     | TYR 19   | OLA 133    |
|                                                            |                  |                                   |                          | TYR 128  | OLA 133    |

Note: HADDOCK tool was used to obtain the OLA-FABP3 complex, since ClusPro is not suitable for docking chemicals, such as oleic acid (OLA), to proteins. Binding free energies ( $\Delta G$ ) and hydrogen bonds (H-Bonds) between receptors and ligands of the best ClusPro or HADDOCK derived docked complexes as calculated by Prodigy webserver.
